# Supplementary material for: Electro-optical properties of a strain-induced borocarbonitride monolayer from many-body perturbation theory
Source: Royal Society of Chemistry journal article supplement (doi:10.1039/d4tc02552k), 2024-01-01
Supplement: d4tc02552k1.pdf [file d4tc02552k1.pdf]

Supporting information for

## Electro-optical properties of a strain-induced borocarbonitride monolayer from many-body perturbation theory

Jia Wan, Haibin Wang, Huabing Shu\*

School of Science, Jiangsu University of Science and Technology, Zhenjiang 212001,  
China

\*E-mail: [shuhuabing@just.edu.cn](mailto:shuhuabing@just.edu.cn)

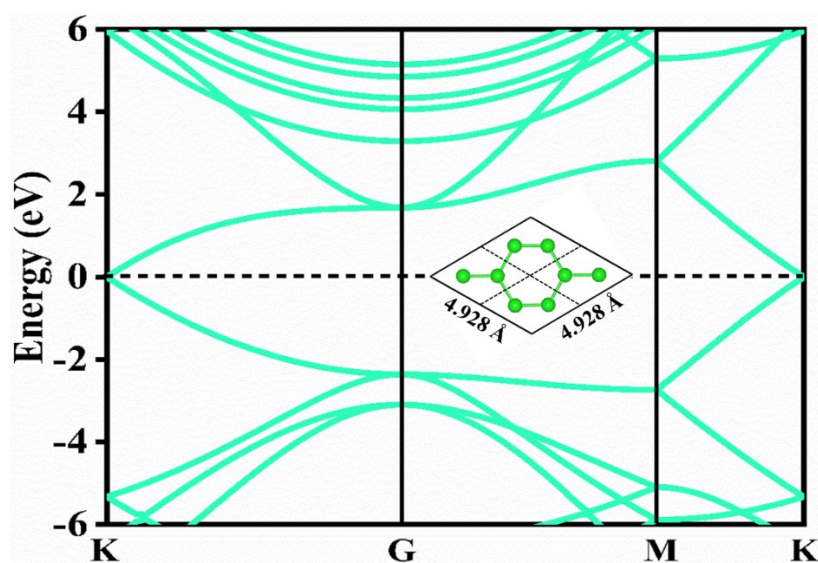

**Fig. S1** Band structure of graphene at PBE level, in which  $2 \times 2$  supercell has been considered.

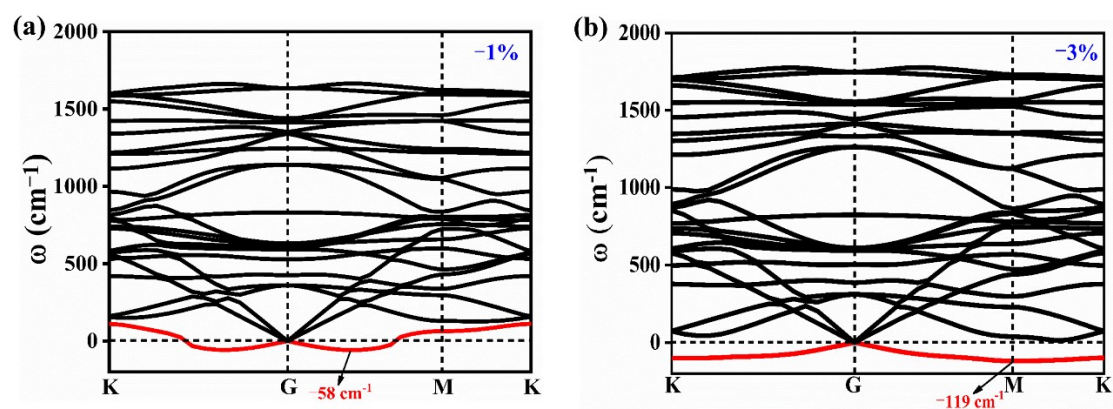

**Fig. S2** Phonon spectra of  $C_6BN$  monolayer under different compressive strains: (a) -1%, (b) -3%.

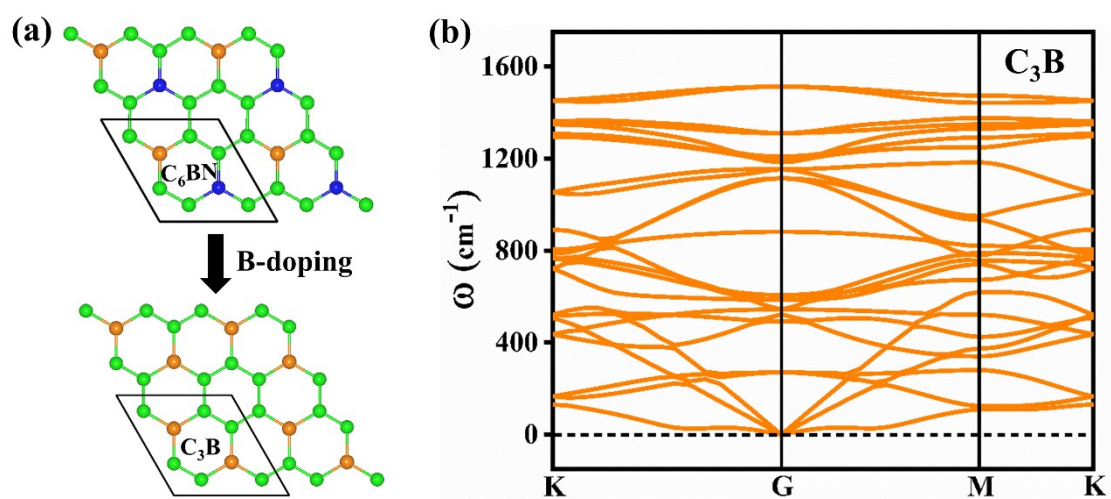

**Fig. S3** (a) Optimized structures of  $C_6BN$  and  $C_3B$  monolayers. The rhombus shows the unit cell. (b) Phonon spectrum of  $C_3B$  monolayer.
